# Supplementary material
Source: publisher figshare collection journal article supplement (https://acs.figshare.com/ndownloader/files/4144873)
Supplement: Supplementary file 1 [file 4144873]

# Rigidity Guided Cell Attachment on Inkjet-Printed Patterns

**Ying-Chih Liao<sup>1\*</sup>, Yun-Ting Ma<sup>1</sup>, Chi-Hui Huang<sup>1</sup>, Jiashing Yu<sup>1</sup>, and Hao-Ming Hsiao<sup>2</sup>**

<sup>1</sup> *Department of Chemical Engineering, National Taiwan University, Taipei, Taiwan*

<sup>2</sup> *Department of Mechanical Engineering, National Taiwan University, Taipei, Taiwan*

\*#1 Sec. 4 Roosevelt Rd., Taipei, Taiwan, e-mail: [liaoy@ntu.edu.tw](mailto:liaoy@ntu.edu.tw)

## **Contents**

1. AFM data for roughness tests
2. Microscopic images of cell morphology on PLA films

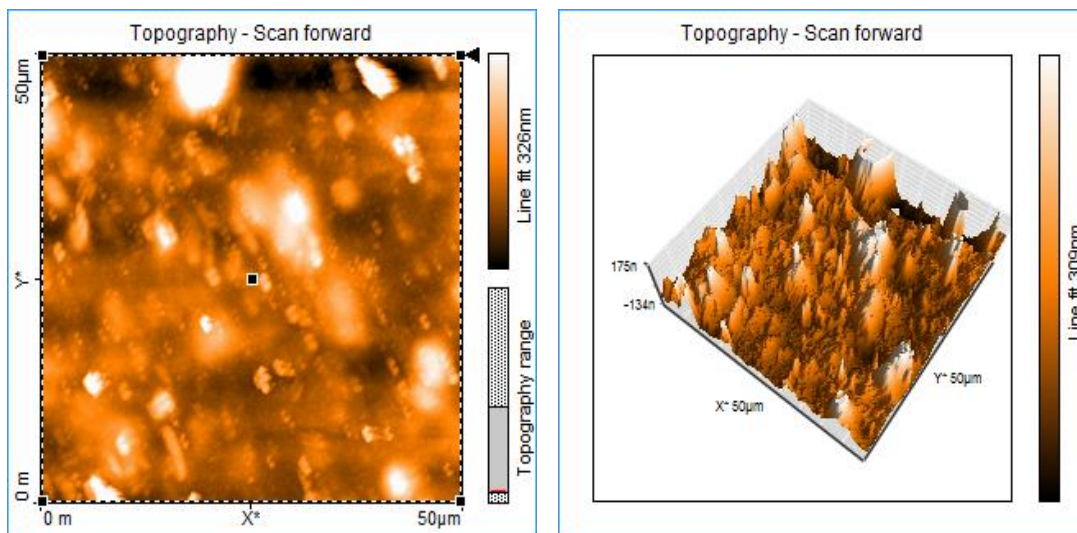

Figure S2 AFM data for one PLA layer on alginate films: color map (left) and 3D View (right).

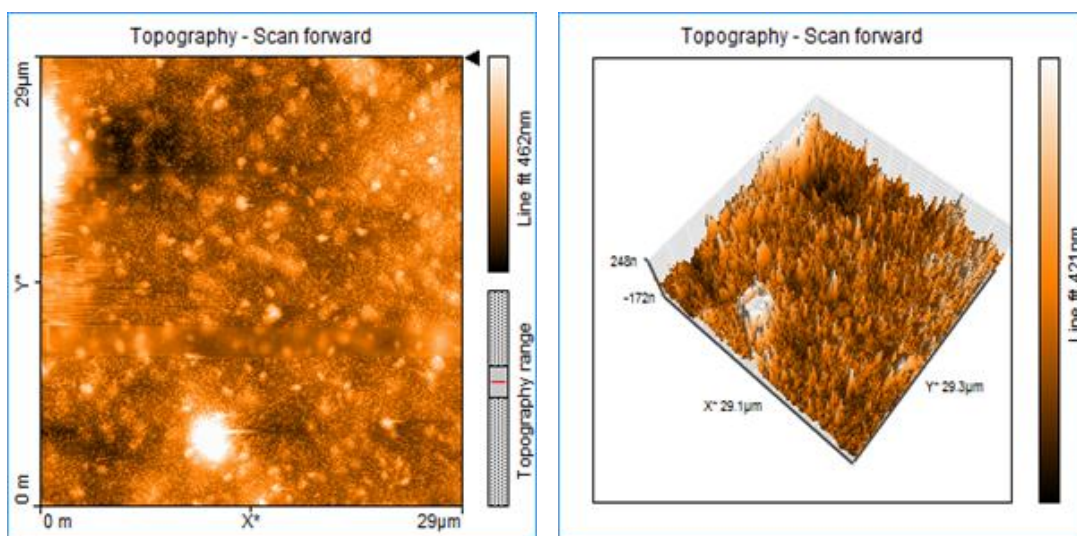

Figure S3 AFM data for two PLA layer on alginate films: color map (left) and 3D View (right).

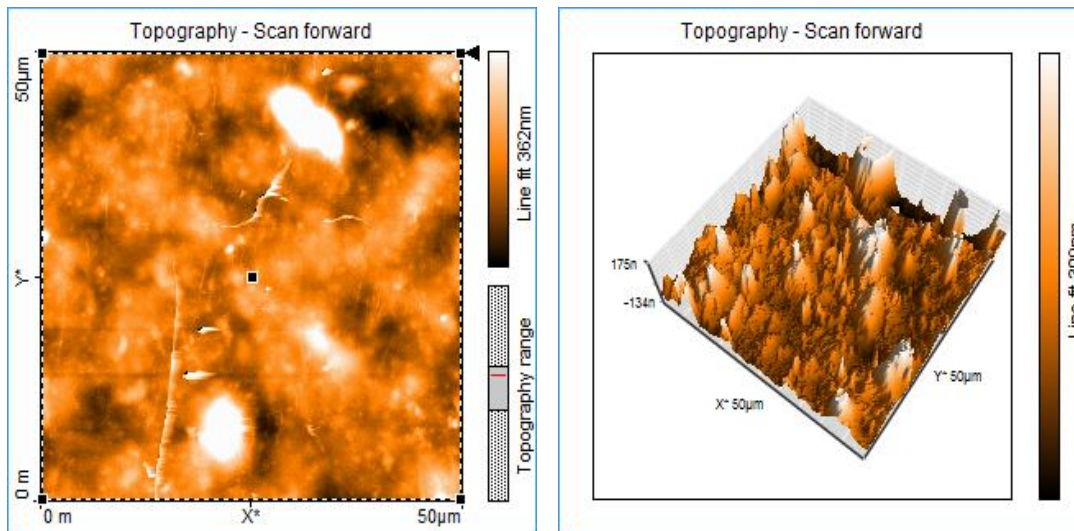

Figure S4 AFM data for three PLA layer on alginate films: color map (left) and 3D View (right).

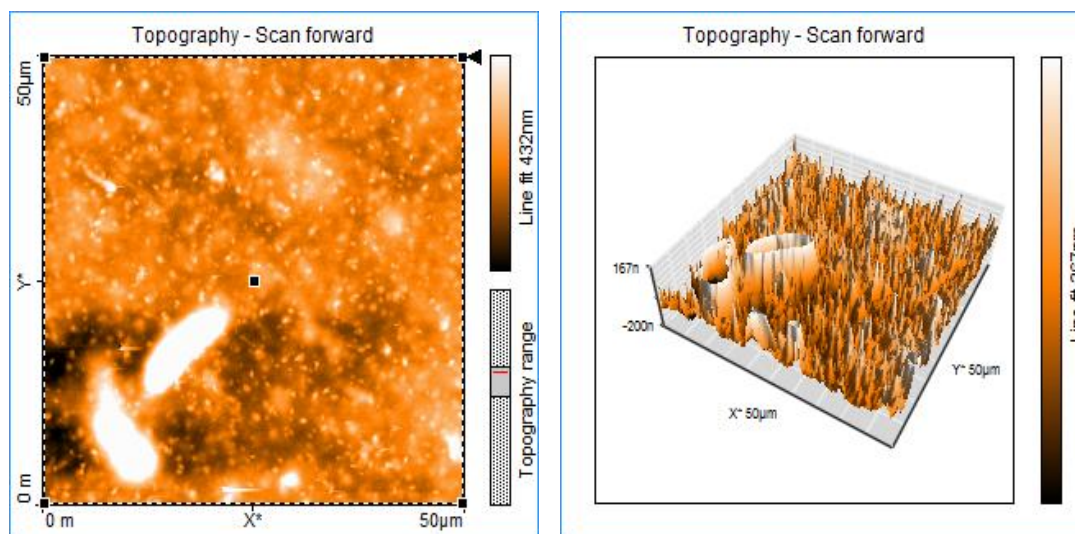

Figure S5 AFM data for four PLA layer on alginate films: color map (left) and 3D View (right).

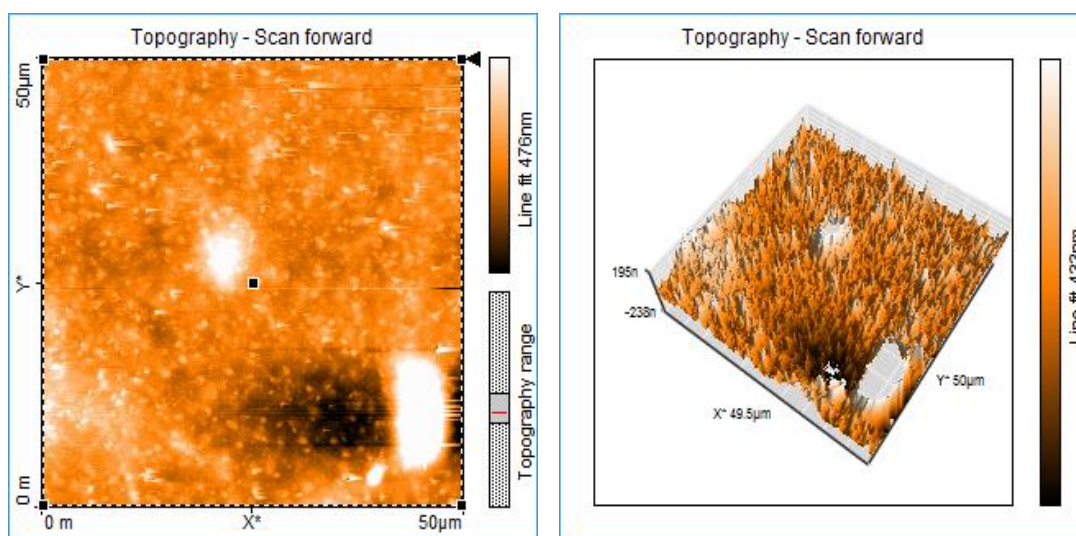

Figure S6 AFM data for five PLA layer on alginate films: color map (left) and 3D View (right).



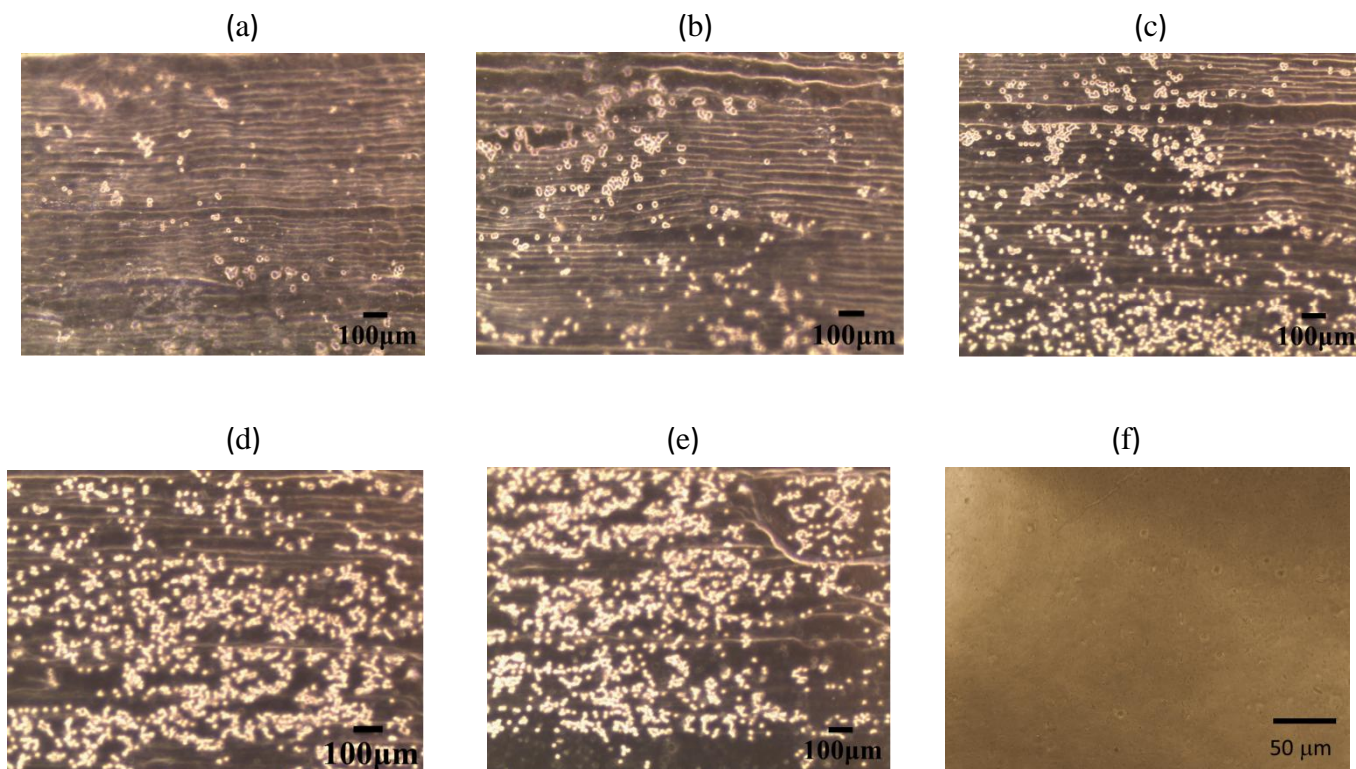

Figure S7 Microscopic images of cell morphology on: (a)-(e) PLA films of various thicknesses, 1-5 stacked layers respectively, and (f) bare alginate film.
